# Supplementary material
Source: PubMed Central journal article supplement (PMC555716)

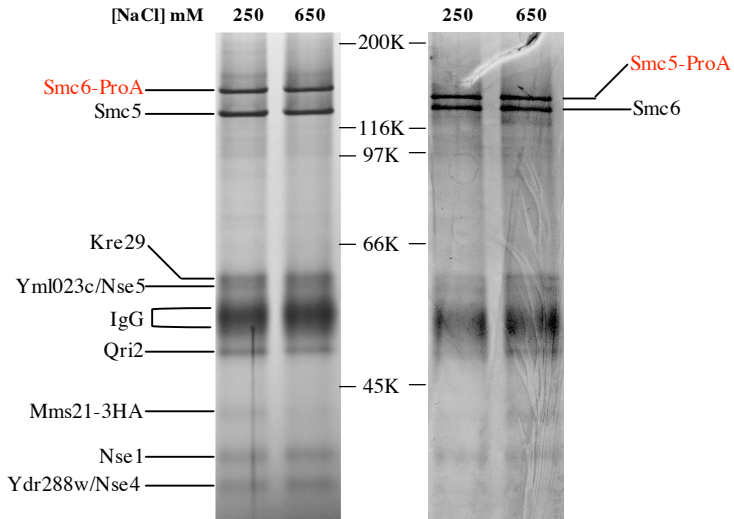

Supplement: pnas_102_13_4777__3.pdf [file pnas_102_13_4777__3.pdf]

WT *mms21-11*-HA  
*mms21-11*

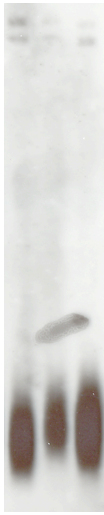

Supplement: pnas_102_13_4777__5.pdf [file pnas_102_13_4777__5.pdf]
